# Supplementary material
Source: Springer Nature journal article supplement (https://www.springermedizin.de/resource/supplementary/12884_2008_45_MOESM1_ESM.pdf/9459812)
Supplement: MOESM1 [file 9459812]

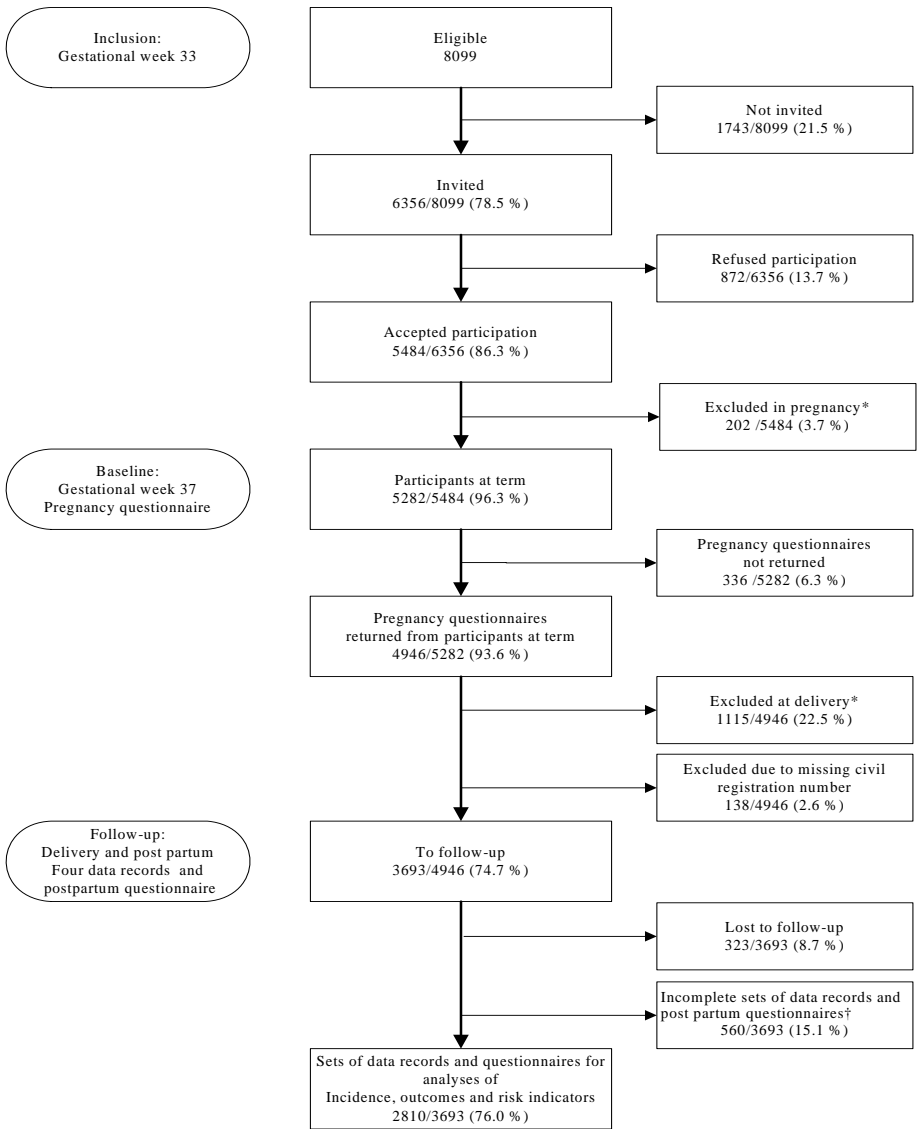

\*Exclusion criteria: < 37 or > 42 gestational weeks, multiple pregnancy, breech presentation, elective cesarean delivery, induction and incorrect inclusion into the study

†Incomplete sets of data records and post partum questionnaires usable for analyses in some substudies of The Danish Dystocia Study
